1                   **INTERFERON ALPHA AND KINASE INHIBITOR NILOTINIB**  
2                   **INCREASE CELL ADHESION AND TUNNELING NANOTUBES IN CML**

3   Running title: Tunneling nanotube induction and cell adhesion

4

5   Maria Omsland<sup>1</sup>, Vibeke Andresen<sup>1,2</sup>, Pilar Ayuda-Durán<sup>3</sup>, Stein-Erik Gullaksen<sup>1</sup>, Randi  
6   Hovland<sup>4</sup>, Jorrit Enserink<sup>3</sup> and Bjørn Tore Gjertsen<sup>1,2\*</sup>

7   <sup>1</sup>Centre for Cancer Biomarkers (CCBIO), Department of Clinical Science, University of Bergen,  
8   Bergen, Norway, <sup>2</sup>Department of Internal Medicine, Haukeland University Hospital, Bergen,  
9   Norway, <sup>3</sup>Department of Molecular Cell Biology, Institute for Cancer Research, The Norwegian  
10   Radium Hospital, Oslo University Hospital, Montebello, Oslo, Norway, <sup>4</sup>Department of Medical  
11   Genetics, Haukeland University Hospital, Bergen, Norway.

12

13   \*Corresponding author: Centre for Cancer Biomarkers, Department of Clinical Science,  
14   University of Bergen, N-5021 Bergen, Norway Email: [bjorn.gjertsen@uib.no](mailto:bjorn.gjertsen@uib.no)

15

16   **Running title:** TKIs induce TNTs in CML cells

17   Keywords: (5) Chronic myeloid leukemia (CML), Tunneling nanotubes (TNTs), Tyrosine Kinase  
18   inhibitors (TKIs), Interleukins, Cell adhesion.

19

20

## Summary statement

21 This study describes the effects of tyrosine kinase inhibitors on tunneling nanotube formation via  
22 increased adhesion through  $\beta$ -integrin in chronic myeloid leukemia cells.

23

## Abstract

24 The actin-containing cell-to-cell communicator tunneling nanotube (TNT) is involved in  
25 regulation of cell death threshold of leukemic cells, while the mechanism of TNT regulation is  
26 mostly unknown. We have investigated TNT formation and its response to treatment in chronic  
27 myeloid leukemia (CML) cells with the pathognomonic chimeric fusion kinase BCR-ABL1 after  
28 treatment with the tyrosine kinase inhibitor nilotinib and interferon- $\alpha$ . Bone marrow cells of  
29 chronic phase CML patients and the CML cell line Kcl-22 formed few or no TNTs. Nilotinib and  
30 interferon- $\alpha$  treatment induced TNT formation in Kcl-22 cells and were found to be linked to  
31 increased adherence to fibronectin coated surfaces by restoration of  $\beta$ 1-integrin function. This  
32 suggests modulation of TNT cell-cell communication in CML as a novel mechanism in kinase  
33 inhibitor therapy of CML.

34

35 **Keywords:** (6) Chronic myeloid leukemia (CML), Tunneling nanotubes (TNTs), Tyrosine kinase  
36 inhibitor (TKIs), IFN $\alpha$ ,  $\beta$ -integrin, Cell adhesion.

37

38

39

40

## Introduction

41 Chronic myeloid leukemia (CML) is a myeloid stem cell disease characterized by the BCR-  
42 ABL1 fusion protein derived from the chromosomal translocation t(9;22), involving bone  
43 marrow and spleen in the chronic phase. The role of BCR-ABL1 in impaired communication  
44 between cells in the microenvironment (Bhatia et al., 1995; Gordon et al., 1987) is less  
45 understood in the context of the efficient therapies with small molecule kinase inhibitors that  
46 emerged at the millennium (Bruck et al., 2018; Hochhaus et al., 2017).

47 The BCR-ABL1 protein has a filamentous (F)-actin binding domain and orchestrates several  
48 cellular processes involving actin processing, cell attachment to fibronectin and cell migration  
49 (Wertheim et al., 2003). Features of CML progenitor cells from patients in the chronic phase  
50 include increased motility and low affinity to fibronectin coated surfaces compared to normal  
51 counterparts (Verfaillie et al., 1992). Interferon alpha (IFN $\alpha$ ), previously pivotal in CML therapy,  
52 increase adhesion of CML progenitor cells to bone marrow stromal cells (Dowding et al., 1991).  
53 Attenuated cellular mobility seems therefore to be a significant mechanism of action in effective  
54 CML therapy, recently revisited in the effective therapeutic combination of a tyrosine kinase  
55 inhibitor (TKI) and IFN $\alpha$  eradicating CML progenitor cells resulting in non-detectable disease  
56 (Hjorth-Hansen et al., 2016; Simonsson et al., 2011).

57 It is well established that the tumor microenvironment and cell-cell interaction plays a pivotal  
58 role in the outcome of cancer therapy (Joyce and Pollard, 2009). One such form of physical  
59 interaction is the tunneling nanotube (TNT) (Rustom et al., 2004). TNTs are defined as thin (50-  
60 200 nm), fragile and dynamic structures, consisting of plasma membrane and F-actin (Abouinit  
61 and Zurzolo, 2012; Rustom et al., 2004). They are involved in cell-cell interaction and  
62 intercellular transport of organelles and pathogens such as virus and bacteria (Gousset et al.,

63 2013; Gurke et al., 2008; Rustom et al., 2004; Sowinski et al., 2008). Leukocytes, their leukemic  
64 counterparts and bone marrow stromal cells have all been reported to form TNTs *in vitro*  
65 (Andresen et al., 2013; Chauveau et al., 2010; Matula et al., 2016; Omsland et al., 2017; Onfelt et  
66 al., 2004; Polak et al., 2015; Reichert et al., 2016). TNTs might represent a mechanism for chemo  
67 resistance in e.g. by transport of oncoproteins as shown between T and B cells, by transfer of  
68 mitochondria from endothelial cells to chemotherapy exposed cancer cells, or by induced drug-  
69 efflux in aggressive forms of pancreatic carcinoma (Ahmad et al., 2014; Desir et al., 2018;  
70 Pasquier et al., 2013; Rainy et al., 2013; Wang and Gerdes, 2015). The impact of TNTs *in vivo* is  
71 so far not well characterized, but it has been described to connect myeloid cells in the cornea of  
72 mouse (Chinnery et al., 2008; Seyed-Razavi et al., 2013) and in resected solid tumors from  
73 patients with malignant pleural mesothelioma and lung adenocarcinoma *in vivo* (Lou et al.,  
74 2012).

75 Here, the role of BCR-ABL1 on TNT formation in CML cells has been characterized. We found  
76 low TNT numbers in CML cells, while treatment with IFN $\alpha$  or the ABL1 inhibitor nilotinib  
77 swiftly induced TNT formation involving  $\beta$ 1-integrin.

78

79

80

81

82

83

84

## Results

### 85 **TNT formation in Kcl-22 cells is increased following treatment with IFN $\alpha$ or the tyrosine** 86 **kinase inhibitor nilotinib**

87 In order to investigate the presence of TNTs between CML cells, primary bone marrow CML  
88 cells were cultured for 24 h on fibronectin coated surfaces and TNTs were quantified as earlier  
89 described for acute myeloid leukemia (AML) cells (Omsland et al., 2017). When we compared  
90 number of TNTs/100 cells in bone marrow cells derived from four different patients diagnosed  
91 with CML (P1-P4), very few TNTs were detected and the cells appeared mobile and  
92 morphologically spherical (Fig. 1A and Fig S1).

93 To further investigate the effect of drug treatment on TNT formation in CML cells, the CML cell  
94 line Kcl-22 was examined before and after treatment with standard CML therapeutics. To enable  
95 live imaging of TNTs the cell line were stably transduced to express a cellular membrane  
96 localized GFP (memGFP). Similar to the primary patient cells, the Kcl-22 cells also demonstrated  
97 very low numbers of TNTs of 0.8 TNTs/100 cells, however, following 24 h IFN $\alpha$  treatment (100  
98 U/ml) resulted in an increase of TNTs to 6.8 TNTs/100 cells (Fig. 1B). Time-lapse microscopy  
99 following 1 h treatment with IFN $\alpha$  (100 U/ml) demonstrated GFP positive dots moving along the  
100 TNTs, from one cell to another, indicating function as transport devices (Fig. 1C and Movie S1).  
101 Next, we treated Kcl-22 for 24 h with pre-apoptotic concentration of the Abl1 tyrosine kinase  
102 inhibitor (TKI) nilotinib (100 nM) and quantified the number of TNTs compared to untreated  
103 cells. This also resulted in induced TNT formation (Fig 1D). Cell viability after nilotinib  
104 treatment was investigated by Hoechst staining, where 24 h treatment induced 10% cell death.  
105 Inhibition of BCR-ABL1 signaling by nilotinib (100 nM) for 24 h was verified by single cell

106 mass cytometry analysis of phospho-specific antibodies (Gullaksen et al., 2017). The nilotinib  
107 treatment resulted in a reduction in phosphorylation of CRKL, STAT5 and CREB among others,  
108 in Kcl-22 cells (Fig. 1E and Fig. S2B). The TNT inducing effect of nilotinib was apparent already  
109 after one hour treatment when we treated the Kcl-22 cells for one hour with nilotinib (Fig. 1F).

### 110 **Nilotinib treatment induces TNTs in an actin dependent manner**

111 Immunofluorescence microscopy of nilotinib-treated Kcl-22 cells (1 h) revealed the presence of  
112 F-actin in the TNTs and the absence of  $\beta$ -tubulin (Fig. 2A). A morphological change was  
113 observed for the nilotinib-treated Kcl-22 cells, from spherical semi-attached cells to more spread-  
114 out and firmly attached cells (Fig. 2A). The critical role of F-actin in these TNTs was further  
115 examined by treating the cells with the actin polymerization inhibitor cytochalasin D (CytD  
116 (Casella et al., 1981)). Kcl-22 cells were treated for 24 h with nilotinib (100 nM) and quantified  
117 for TNTs before treatment with CytD (2  $\mu$ M) for 20 min followed by a second TNT  
118 quantification (Fig. 2B). This showed that the CytD treatment resulted in TNT collapse and less  
119 prominent cell stretching (Fig. 2B, C). These data demonstrate that inhibition of BCR-ABL1 by  
120 nilotinib induces the formation of TNTs in actin polymerization dependent manner.

### 121 **Expression of BCR-ABL1 results in reduced TNT formation and spherical cell shape**

122 To further study the involvement of BCR-ABL1 in TNT formation, a doxycycline inducible  
123 BCR-ABL1 protein (Klucher et al, 1998) (p210) was introduced in Ba/F3 cells. Ba/F3 cells  
124 represent a well explored system for characterization of the oncogene function of BCR-ABL1,  
125 where expression of BCR-ABL1 allows Ba/F3 cells to proliferate independent of IL-3 (Daley and  
126 Baltimore, 1988). The induction of BCR-ABL1 expression by doxycycline was verified by  
127 immunoblotting and IL-3-independent proliferation (Fig. 3A, Fig. S2A). In the Ba/F3 cells, BCR-

128 ABL1 expression resulted in a morphological change from mostly non-spherical and semi-  
129 attached cells to spherical and less firmly attached to the fibronectin coated plastic culture well  
130 (Fig. 3B). Interestingly, expression of BCR-ABL1 was also accompanied by down-regulation of  
131 TNTs (Fig. 3C). This down-regulation of TNTs was not due to the doxocycline treatment, since  
132 treatment of Ba/F3 cells transfected with an empty vector resulted in an increase in TNT  
133 formation rather than a decrease (Fig. 3C). Treatment of Kcl-22 cells with nilotinib (100 nM) or  
134 IFN $\alpha$  for 1 h resulted in the opposite change compared to the Ba/F3 cells from round non-  
135 attached cells to stretched firmly attached cells (Fig. 2A and 3D), suggesting that BCR-  
136 ABL1 expression result in a spherical cell morphology, reduced attachment to fibronectin and  
137 TNT formation.

#### 138 **TNT formation and increased cell surface adhesion induced by drug treatment**

139 Cell adherence to fibronectin has been found to correlate with TNT formation and treatment of  
140 CML cells with IFN $\alpha$  and TKIs have been showed to increase cell adherence to fibronectin,  
141 described through a restoration of the  $\beta$ 1 integrin by IFN $\alpha$  (Bhatia and Verfaillie, 1998; Dowding  
142 et al., 1991; Obr et al., 2014; Reichert et al., 2016). To study the role of cell adherence through  $\beta$ 1  
143 integrin in TNT formation, we pre-incubated Kcl-22 cells for 30 min with a blocking antibody  
144 against  $\beta$ 1 integrin before 1 h treatment with either IFN $\alpha$  (100 U/ml) or nilotinib (100 nM). The  
145 control Kcl-22 cells, not pre-incubated with the  $\beta$ 1 integrin blocking antibody, changed cell  
146 morphology and significantly changed the cell surface area ( $\mu\text{m}^2$ ) on the fibronectin coated  
147 culture wells following nilotinib treatment, whereas IFN $\alpha$  treatment only resulted in altered  
148 morphology without significant changes in cell surface area (Fig. 4A-B). Strikingly, these  
149 nilotinib and IFN $\alpha$ -induced changes in cell morphology were completely blocked by pre-  
150 incubation with the  $\beta$ 1 integrin blocking antibody (Fig. 4C-D). When cell motility was measured

151 by time-lapse microscopy, the IFN $\alpha$  and nilotinib-induced change in cell morphology was  
152 associated with a significant decrease in cell motility. Conversely, pre-treatment with the  $\beta$ 1  
153 blocking antibody resulted in increased cell motility (Fig. 4C-D) suggesting a direct connection  
154 between increased functionality of integrin  $\beta$ 1 and cell adherence, here induced by IFN $\alpha$  and  
155 nilotinib leading to increased TNT formation.

## 156 **Discussion**

157 TNT is a dynamic 50-200 nm structure consisting of plasma membrane and F-actin, but with  
158 elusive understanding of how its formation is regulated (Zaccard et al., 2016). Since the BCR-  
159 ABL1 fusion protein in CML has a strong impact on F-actin and simultaneously affects various  
160 signaling pathways (Van Etten et al., 1994) we examined the effect of BCR-ABL1 on TNT  
161 formation. Both bone marrow derived BCR-ABL1 positive cells from CML patients and the  
162 CML cell line Kcl-22 displayed low numbers of TNTs compared to acute myeloid leukemia cells  
163 and other cancer cells (Hase et al., 2009; Omsland et al., 2017; Reichert et al., 2016). One  
164 possible explanation for the low TNT numbers could relate to the observation that CML cells  
165 adhere poorly to the bone marrow stroma (Gordon et al., 1987), consequently resulting in  
166 interrupted cellular TNT communication. TNT formation between cells *in vitro* is highly  
167 dependent on adherence, and culturing leukocytes on a supportive layer of mesenchymal stem  
168 cells (MSCs) or fibronectin increase TNT formation (Osteikoetxea-Molnar et al., 2016; Reichert  
169 et al., 2016). IFN $\alpha$  was the first effective CML therapy and is now being re-evaluated in  
170 combination with TKIs like dasatinib (Apperley, 2015; Hjorth-Hansen et al., 2016). Interestingly,  
171 one of the proposed mechanisms for the efficacy of IFN $\alpha$  in treatment of CML patients was  
172 through its ability to restore adhesion of CML cells to the bone marrow stroma (Dowding et al.,  
173 1993). Similarly, TKI treatments result in increased CML cell adherence to fibronectin (Obr et



174 al., 2014). Together, these observations suggest that restoration of adherence in CML cells could  
175 be central to successful treatment of CML patients.

176 Interestingly, both increased adhesion and change in morphology was observed in the CML cell  
177 line Kcl-22 after treatment with nilotinib or IFN $\alpha$  accompanied by a significant increase in TNT  
178 formation (Fig. 1B, D and Fig. 3D). Evidence for an involvement of BCR-ABL1 in TNT  
179 formation was obtained using the doxycycline-inducible system of BCR-ABL1 expression in the  
180 Ba/F3 cells. BCR-ABL1 induction caused these cells to appear more morphologically spherical  
181 compared to the Ba/F3 control cells (Fig. 3B). This confirmed observations by others where  
182 BCR-ABL1 expression in Ba/F3 cells induced cell detachment, and increased motility (Salgia et  
183 al., 1997).

184 To verify the importance of cell adhesion in TNT induction we incubated Kcl-22 cells with an  
185 integrin  $\beta$ 1 blocking antibody before treatment with IFN $\alpha$  or nilotinib. Indeed, we found that the  
186 cell adhesion effect by the two therapeutics were dependent of  $\beta$ 1 integrin (Fig. 4C). The Kcl-22  
187 cells showed increased mobility and a more spherical morphology after pre-incubation with the  
188 integrin  $\beta$ 1 blocking antibody (Fig. 4D). Together with the results obtained in the Ba/F3 cell  
189 model system, this supports a hypothesis where these CML cells form few TNT structures when  
190 adhering poorly to fibronectin as a consequence of showing a spherical appearance.

191 Taken together, we find that TNTs were induced in Kcl-22 cells following IFN $\alpha$  and nilotinib  
192 treatment as a result of increased cell adhesion after restoration of the  $\beta$ 1-integrin function. TNT  
193 communication might be an important factor of the successful treatment of CML which merits  
194 further investigation in the future.

195

196

## Materials and Methods

### 197 **Cell lines**

198 Kcl-22 and Ba/F3 cells (ATCC and DSMZ, mycoplasma tested while experiments were carried  
199 out) were cultured according to provider's instructions. RPMI-1640 medium was supplemented  
200 with 10% FBS, 1% L-glutamine (2mM) and 1% (1.0 U/ml) penicillin and streptomycin (5mM)  
201 (Sigma-Aldrich). The RPMI-1640 medium for the IL-3 dependent Ba/F3 cells were additionally  
202 supplemented with 10% conditioned medium from WEHI3B cells (mouse myelomonocytic cell  
203 line) known to secrete high amounts of IL-3 (Lee et al., 1982). The WEHI3B cells were grown to  
204 confluency in a T75 flask with complete IMDM medium (containing 10% FBS, 1% Pen-Strep  
205 and L-glutamine), and cultured for 2-3 days before the supernatant was centrifuged at 1500 RPM  
206 for 10 min and sterile filtered through a 0.2 µm filter.

207

### 208 **Mem-GFP transduced cells**

209 The memGFP-Kcl-22 cells were generated by transducing the cells with ready-to-use lentiviral  
210 particles expressing a membrane localization signal (20 amino acids of the N-terminal part of  
211 neuromodulin, containing a palmitoylation signal) fused to GFP; rLV-EF1-AcGFP-Mem-9  
212 (Takara, rV2.1A1.1941 C2) according to the provider's instructions. The transduced cells were  
213 sorted using BD FACS Aria SORP at the Flow Cytometry Core Facility, Department of Clinical  
214 Science, University of Bergen, Norway.

215

### 216 **Primary cells**

217 The study was conducted in accordance with the Declaration of Helsinki and approved by the  
218 local Ethics Committee (Regional Ethics Committee West projects 2012/2245 and 2012/2247,

219 University of Bergen, Norway). Blood and bone marrow samples from consecutively diagnosed  
220 CML patients were collected after informed consent and were processed by density gradient  
221 separation (Lymphoprep, Axis-Shield, Oslo, Norway) (Bruserud et al., 2001).

222

### 223 **Doxycycline inducible Ba/F3 cells**

224 BCR-ABL1 (P210) was cloned into pcDNA3 (Adgene) after EcoRI digestion. The orientation  
225 and sequence was verified by PCR. This was further sub-cloned into the EcoRI site of PLVX-  
226 tetOne-Puro (from the Lenti-X Tet-One Inducible Expression Systems). Wild type Ba/F3 (kind  
227 gift to Prof. Enserink from Prof. Gordon Mills laboratory, Houston, Texas, USA) was transfected  
228 with 2 µg of the PLVX\_tetOne\_BCR-ABL1 plasmid or PLVX\_tetOne\_empty vector by  
229 electroporation (Amaxa biosystems nucleofector II: program U20) using Ingenio Electroporation  
230 solution (catalog number MIR 50114). Transfected cells were cultured in medium for 24-72 h  
231 before selection with 1 µg/ml puromycin. Puromycin resistant clones were sorted and grown  
232 independently; cells were continually cultured in medium with puromycin to maintain selection  
233 pressure. 0.1 µg/ml doxycycline was added to induce expression of BCR-ABL1.

234

### 235 **Antibodies and reagents**

236 The following primary antibodies were used for immunofluorescence and/or immunoblotting:  
237 anti-β-tubulin (clone TUB 2.1, Sigma-Aldrich, 1:1000), anti-COX IV (ab16056, 1:2500), anti-  
238 cAbl ((24-11) sc-23, Santa Cruz Biotechnology, 1:1000), anti-integrin β1 blocking antibody  
239 [P5D2] (ab24693, Abcam). Secondary antibodies used for immunofluorescence or  
240 immunoblotting; Alexa Fluor<sup>®</sup> 488- or 594-conjugated goat-anti-mouse (Invitrogen, 1:5000),  
241 horseradish peroxidase (HRP)-conjugated goat anti-rabbit/mouse (Jackson ImmunoResearch, 1:10

242 000). The following were used for actin and membrane staining; AlexaFluor<sup>®</sup> 350-conjugated  
243 phalloidin and wheat germ agglutinin (WGA) –Alexa Fluor<sup>®</sup> 594 or 488 (Invitrogen) as  
244 previously described (Omsland et al., 2017). Tyrosine kinase inhibitor: Nilotinib (Selleckchem).  
245 Interferon alpha (IFN $\alpha$ ) (Intron A from MSD), Cytochalasin D (Sigma-Aldrich), doxycycline  
246 (Doxyferm, Nordic Drugs AB, Limhamn), puromycin (Sigma-Aldrich), Bovine serum albumin  
247 (BSA) fraction V (Roche), fibronectin (Sigma-Aldrich). The determination of the concentrations  
248 of new antibodies was carried out in the laboratory when they arrived.

249

### 250 **TNT identification and quantification**

251 A TNT in this study is defined as a thin straight structure,  $\leq 200$  nm in diameter, minimum 5  $\mu$ m  
252 in length, hovering above the substratum, connecting two cells. TNTs were distinguished from  
253 cytoplasmic bridges, which appear following cell division, by the lack of a midbody clearly  
254 visible by differential interference contrast and/or staining of cellular membranes (Omsland et al.,  
255 2017). 8-well  $\mu$ -slides (Ibidi GmbH) were pre-coated with fibronectin (10  $\mu$ g/ml, F2006, Sigma-  
256 Aldrich) for 30 min at 37°C before washing with saline. 70000 cells were seeded per well and  
257 incubated overnight under physiological conditions. Primary CML cells were seeded in DMEM  
258 medium containing 20% FBS overnight and stained with wheat germ agglutinin conjugated with  
259 alexa fluor 488 or 594 (1.67  $\mu$ g/ml) as previously described (Omsland et al., 2017). Cells were  
260 examined live by fluorescent light microscopy (Zeiss Axio Observer Z1 with AxioVision 4.8.2 or  
261 Zen software) using a 63X/1.4 NA Oil DICIII objective, heat block (37°C) and standard air  
262 conditions. 100 cells per well were counted following a fixed counting pattern with 5-6 cells  
263 examined per vision field. The result is described as number of TNTs/100 cells meaning the total  
264 number of TNTs (one TNT always connects two cells) among 100 cells counted. For further

265 details see Supplementary Figure in Omsland et al (Omsland et al., 2017). Cell viability was  
266 monitored by Hoechst 3342 (Sigma) staining as previously described (McCormack et al., 2012).

267

### 268 **Blocking of integrin $\beta$ -1**

269 Cells were cultured in a  $0.7 \times 10^6$  cells/ml density in a 6-well plate. Cells were incubated in  
270 medium without or with 10  $\mu$ g/ml of anti-integrin beta 1 [P5D2] antibody for 30 min before  
271 seeded to fibronectin pre-coated  $\mu$ -slides (Ibidi GmbH). Cells were incubated for 3 h to allow  
272 attachment before treatment with 1  $\mu$ M nilotinib (nilo) or 100 U/ml IFN $\alpha$  1 h prior to  
273 examination by live microscopy.

274 Measuring of cell area was performed manually using ImageJ: Images were analyzed as 8-bit  
275 files using FFT Bandpass Filter, threshold was set manually and adjusted until cells were  
276 distinguished from the background>convert to mask>fill holes>cells in close proximity were then  
277 distinguished using watershed algorithm. Measuring of the cell area was performed using the  
278 measure tool under the region of interest manager tool and single cells were selected using the  
279 wand tool.

280 Tracking of cells was performed using metamorph and the chemotaxis and migration (Ibidi  
281 GmbH) plugin to ImageJ was performed to calculate accumulated distance and to make trajectory  
282 plots as described in (Hurley et al., 2013).

283

### 284 **Immunofluorescence**

285 The F-actin and microtubule presence in TNTs was investigated in Kcl-22 cells (on 8-well  $\mu$ -  
286 slides, Ibidi GmbH) fixed in 4% PFA in PBS and 0.2% glutaraldehyde in PBS for 20 min at room  
287 temperature (RT) followed by one wash with PBS, before permeabilized for 1 min using 0.2%

288 Tween<sup>®</sup> in PBS and washed twice with PBS. Cells were blocked with 0.5% Bovine Serum  
289 Albumin Fraction V (BSA) PBS for 20 min at RT and then incubated for 1 h at RT in the dark  
290 with 33nM AlexaFluor<sup>®</sup> phalloidin, washed once with PBS and incubated with anti- $\beta$ -tubulin  
291 antibody (1:200 in blocking solution) overnight at 4°C. Then cells were washed twice with PBS  
292 and incubated with Alexa-488 or 594 goat-anti-mouse antibodies (1:5000 in blocking solution)  
293 for 1h at RT, before washed twice with PBS and examined by fluorescence microscopy. Cells not  
294 expressing memGFP were stained with wheat germ agglutinin (WGA) conjugated with Alexa  
295 488 or 594 for 8 min followed by one wash with PBS before examined by microscopy and  
296 manual quantification of TNTs.

297

## 298 **Immunoblotting**

299 Cells were lysed and analyzed by immunoblotting according to standard protocol (Shieh et al.,  
300 1999; Silden et al., 2013). Briefly, immunoblotting was performed using precast gels from  
301 BioRad, transferred to PVDF membranes using Pierce G2 fast blotter (Thermo Scientific).  
302 Membranes were blocked for 1h at RT in 5% fat-free drymilk or 5% BSA in TBST, incubated  
303 with primary antibody at 4°C overnight. Membranes were washed with TBST followed by  
304 incubation for 1 h with secondary antibody ((HRP)-conjugated goat-anti-rabbit/mouse) was  
305 diluted 1:1000 in 5% drymilk in TBST and washed with TBST before developed using  
306 SuperSignal West pico or femto (Thermo Fisher Scientific). Developed immunoblots were  
307 detected and captured by ImageQuant LAS 4000 (GE Healthcare Life Sciences).

308

309

## 310 **Mass Cytometry**

## 311 **Barcoding**

312 To reduce experiment variability, workload and antibody consumption, we used the  
313 commercially available metal barcoding kit from Fluidigm. Briefly, the cells from each sample  
314 were stained with a unique three-palladium isotope combination; three chosen from six available;  
315 Pd 102, Pd 104, Pd 105, Pd 106, Pd 108, Pd 110 (20 unique combinations available). After cell  
316 barcoding and washing according to the manufacturers' recommendations, uniquely barcoded  
317 samples were pooled for further processing for mass cytometry analysis.

## 318 **Antibody staining**

319 A pool of barcoded cells was stained with a panel of cell surface markers (30 minutes, RT) and  
320 permeabilized with methanol (-20°C). Further staining with intracellular phospho-specific  
321 antibodies (30 minutes, RT) followed. Cells were then washed and re-suspended in the buffer  
322 containing Iridium-intercalator (natural abundance iridium as pentamethylcyclopentadienyl-  
323 Iridium (III)-dipyridophenazine), which intercalates into the DNA (1 hour, 4°C), before washed  
324 and pelleted by centrifugation. Immediately prior to data acquisition cells were re-suspended to a  
325 final concentration of approximately  $5 \times 10^5$  cells/mL in MaxPar water (Fluidigm) containing  
326 normalization beads (1:10 dilution, Fluidigm) and analyzed on a Helios mass cytometer  
327 (Fluidigm), placed in the Flow Cytometry Core Facility of Bergen, University of Bergen.

## 328 **Single cell discrimination and barcoding de-convolution**

329 Using the normalization beads and the normalization software, any drift in the data resulting  
330 from loss of detector sensitivity was abrogated. An automatic barcode deconvolution algorithm  
331 developed by Zunder *et al* 2015 (Zunder et al., 2015) was used to identify each uniquely  
332 barcoded sample. Further discrimination and gating of single cells was achieved by plotting all

333 events by DNA-content (Ir 191 or Ir 103) versus Event Length (number of pushes). Together,  
 334 barcode deconvolution and gating of cells on DNA content versus event length, is an effective  
 335 filter for removal of doublets and identification of single cells. Finally, cleaved Caspase 3 readily  
 336 discriminated between apoptotic and non-apoptotic cells, where non-apoptotic cells were used  
 337 for statistical analysis.

338 Table 1 Antibody panel for mass cytometry analysis

| A.m.u | Metal | Epitope                  | Clone      | Vendor                      |
|-------|-------|--------------------------|------------|-----------------------------|
| 102   | Pd    | Metal Barcode Channel #1 | N.A.       | Fluidigm                    |
| 104   | Pd    | Metal Barcode Channel #2 | N.A.       | Fluidigm                    |
| 105   | Pd    | Metal Barcode Channel #3 | N.A.       | Fluidigm                    |
| 106   | Pd    | Metal Barcode Channel #4 | N.A.       | Fluidigm                    |
| 108   | Pd    | Metal Barcode Channel #5 | N.A.       | Fluidigm                    |
| 110   | Pd    | Metal Barcode Channel #6 | N.A.       | Fluidigm                    |
|       |       |                          |            |                             |
| 89    | Y     | CD45                     | HI30       | Fluidigm                    |
| 141   | Pr    | pBCR Y177                | Polyclonal | Cell Signaling Technologies |
| 142   | Nd    | Caspase 3 Cleaved        | D3E9       | Fluidigm                    |
| 143   | Nd    | pCrkL [Y207]             | Polyclonal | Fluidigm                    |
| 149   | Sm    | p4E-BP1                  | 236B4      | Fluidigm                    |
| 150   | Nd    | pStat5 [Y694]            | 47         | Fluidigm                    |
| 153   | Eu    | pStat1 [Y701]            | 58D6       | Fluidigm                    |
| 154   | Sm    | pAbl Y245                | 73E5       | Cell Signaling Technologies |
| 156   | Gd    | p-p38 [T180/Y182]        | D3F9       | Fluidigm                    |
| 158   | Gd    | pStat3 [Y705]            | 4/P-STAT3  | Fluidigm                    |
| 165   | Ho    | pCREB [S133]             | 4/P-STAT3  | Fluidigm                    |
| 167   | Yb    | pERK 1/2 [T202/Y204]     | D1314.4E   | Fluidigm                    |
| 172   | Yb    | pS6 [S235/S236]          | N7-548     | Fluidigm                    |
| 176   | Yb    | pS6 [S240/S244]          | D68F8      | Cell Signaling Technologies |
|       |       |                          |            |                             |
| 191   | Ir    | DNA                      | N.A.       | Fluidigm                    |
| 193B  | Ir    | DNA                      | N.A.       | Fluidigm                    |

339

340 **Statistical analysis**



341 Differences between two groups were analyzed by two-tailed unpaired T-test using GraphPad  
342 Prism 6 Version 6.03. F-test was performed to verify that the internal variance in the groups were  
343 not significant. Significant difference was considered by a P-value  $<0.05$ . For cell area and cell  
344 movement unpaired Mann Whitney tests were performed.

345

346

### **Acknowledgements**

347 We thank Dr. André Sulen for help with sorting the Kcl-22-mem-GFP cells and Calum Leitch  
348 and Dr. Genoveffa Franchini for helpful feedback on the manuscript. We thank Dr. Tatiana  
349 Karpova for assistance with the analysis of cell movement.

350

### **Competing interests**

351 The authors declare no conflicts of interests.

352

### **Funding**

353 This study was supported by University of Bergen (MO), Norwegian Cancer Society with  
354 Solveig & Ole Lunds Legacy (BTG) and Øyvinn Mølbach-Petersens Fond for Clinical Research  
355 (BTG; (Grant no. 104712, 145268, 145269 and 163424) and Bergen Research Foundation (VA).

356

357

358

359

360

## References

361 **Abounit, S. and Zurzolo, C.** (2012). Wiring through tunneling nanotubes--from electrical signals  
362 to organelle transfer. *J Cell Sci* **125**, 1089-98.

363 **Ahmad, T., Mukherjee, S., Pattnaik, B., Kumar, M., Singh, S., Kumar, M., Rehman, R.,**  
364 **Tiwari, B. K., Jha, K. A., Barhanpurkar, A. P. et al.** (2014). Miro1 regulates intercellular  
365 mitochondrial transport & enhances mesenchymal stem cell rescue efficacy. *The EMBO journal* **33**, 994-  
366 1010.

367 **Andresen, V., Wang, X., Ghimire, S., Omsland, M., Gjertsen, B. T. and Gerdes, H. H.**  
368 (2013). Tunneling nanotube (TNT) formation is independent of p53 expression. *Cell death and*  
369 *differentiation* **20**, 1124.

370 **Apperley, J. F.** (2015). Chronic myeloid leukaemia. *Lancet* **385**, 1447-59.

371 **Bhatia, R., McGlave, P. B., Dewald, G. W., Blazar, B. R. and Verfaillie, C. M.** (1995).  
372 Abnormal function of the bone marrow microenvironment in chronic myelogenous leukemia: role of  
373 malignant stromal macrophages. *Blood* **85**, 3636-45.

374 **Bhatia, R. and Verfaillie, C. M.** (1998). Inhibition of BCR-ABL expression with antisense  
375 oligodeoxynucleotides restores beta1 integrin-mediated adhesion and proliferation inhibition in chronic  
376 myelogenous leukemia hematopoietic progenitors. *Blood* **91**, 3414-22.

377 **Bruck, O., Blom, S., Dufva, O., Turkki, R., Chheda, H., Ribeiro, A., Kovanen, P.,**  
378 **Aittokallio, T., Koskenvesa, P., Kallioniemi, O. et al.** (2018). Immune cell contexture in the bone  
379 marrow tumor microenvironment impacts therapy response in CML. *Leukemia*.

380 **Bruserud, O., Gjertsen, B. T., Foss, B. and Huang, T. S.** (2001). New strategies in the  
381 treatment of acute myelogenous leukemia (AML): in vitro culture of aml cells--the present use in  
382 experimental studies and the possible importance for future therapeutic approaches. *Stem Cells* **19**, 1-11.

383 **Casella, J. F., Flanagan, M. D. and Lin, S.** (1981). Cytochalasin D inhibits actin polymerization  
384 and induces depolymerization of actin filaments formed during platelet shape change. *Nature* **293**, 302-5.

385 **Chauveau, A., Aucher, A., Eissmann, P., Vivier, E. and Davis, D. M.** (2010). Membrane  
386 nanotubes facilitate long-distance interactions between natural killer cells and target cells. *Proc Natl Acad*  
387 *Sci U S A* **107**, 5545-50.

388 **Chinnery, H. R., Pearlman, E. and McMenamin, P. G.** (2008). Cutting edge: Membrane  
389 nanotubes in vivo: a feature of MHC class II+ cells in the mouse cornea. *Journal of immunology*  
390 (*Baltimore, Md : 1950*) **180**, 5779-83.

391 **Daley, G. Q. and Baltimore, D.** (1988). Transformation of an interleukin 3-dependent  
392 hematopoietic cell line by the chronic myelogenous leukemia-specific P210bcr/abl protein. *Proc Natl*  
393 *Acad Sci U S A* **85**, 9312-6.

394 **Desir, S., O'Hare, P., Vogel, R. I., Sperduto, W., Sarkari, A., Dickson, E. L., Wong, P.,**  
395 **Nelson, A. C., Fong, Y., Steer, C. J. et al.** (2018). Chemotherapy-Induced Tunneling Nanotubes Mediate  
396 Intercellular Drug Efflux in Pancreatic Cancer. *Sci Rep* **8**, 9484.

- 397 **Dowding, C., Gordon, M., Guo, A. P., Maison, D., Osterholz, J., Siczkowski, M. and**  
398 **Goldman, J.** (1993). Potential mechanisms of action of interferon-alpha in CML. *Leuk Lymphoma* **11**  
399 **Suppl 1**, 185-91.
- 400 **Dowding, C., Guo, A. P., Osterholz, J., Siczkowski, M., Goldman, J. and Gordon, M.** (1991).  
401 Interferon-alpha overrides the deficient adhesion of chronic myeloid leukemia primitive progenitor cells to  
402 bone marrow stromal cells. *Blood* **78**, 499-505.
- 403 **Gordon, M. Y., Dowding, C. R., Riley, G. P., Goldman, J. M. and Greaves, M. F.** (1987).  
404 Altered adhesive interactions with marrow stroma of haematopoietic progenitor cells in chronic myeloid  
405 leukaemia. *Nature* **328**, 342-4.
- 406 **Gousset, K., Marzo, L., Commere, P. H. and Zurzolo, C.** (2013). Myo10 is a key regulator of  
407 TNT formation in neuronal cells. *J Cell Sci* **126**, 4424-35.
- 408 **Gullaksen, S. E., Skavland, J., Gavasso, S., Tosevski, V., Warzocha, K., Dumrese, C.,**  
409 **Ferrant, A., Gedde-Dahl, T., Hellmann, A., Janssen, J. et al.** (2017). Single cell immune profiling by  
410 mass cytometry of newly diagnosed chronic phase chronic myeloid leukemia treated with nilotinib.  
411 *Haematologica* **102**, 1361-1367.
- 412 **Gurke, S., Barroso, J. F., Hodneland, E., Bukoreshtliev, N. V., Schlicker, O. and Gerdes, H.**  
413 **H.** (2008). Tunneling nanotube (TNT)-like structures facilitate a constitutive, actomyosin-dependent  
414 exchange of endocytic organelles between normal rat kidney cells. *Exp Cell Res* **314**, 3669-83.
- 415 **Hase, K., Kimura, S., Takatsu, H., Ohmae, M., Kawano, S., Kitamura, H., Ito, M., Watarai,**  
416 **H., Hazelett, C. C., Yeaman, C. et al.** (2009). M-Sec promotes membrane nanotube formation by  
417 interacting with Ral and the exocyst complex. *Nature cell biology* **11**, 1427-32.
- 418 **Hjorth-Hansen, H., Stentoft, J., Richter, J., Koskenvesa, P., Høglund, M., Dreimane, A.,**  
419 **Porkka, K., Gedde-Dahl, T., Gjertsen, B. T., Gruber, F. X. et al.** (2016). Safety and efficacy of the  
420 combination of pegylated interferon-alpha2b and dasatinib in newly diagnosed chronic-phase chronic  
421 myeloid leukemia patients. *Leukemia* **30**, 1853-60.
- 422 **Hochhaus, A., Larson, R. A., Guilhot, F., Radich, J. P., Branford, S., Hughes, T. P.,**  
423 **Baccarani, M., Deininger, M. W., Cervantes, F., Fujihara, S. et al.** (2017). Long-Term Outcomes of  
424 Imatinib Treatment for Chronic Myeloid Leukemia. *N Engl J Med* **376**, 917-927.
- 425 **Hurley, A., Smith, M., Karpova, T., Hasley, R. B., Belkina, N., Shaw, S., Balenga, N., Druey,**  
426 **K. M., Nickel, E., Packard, B. et al.** (2013). Enhanced effector function of CD8(+) T cells from healthy  
427 controls and HIV-infected patients occurs through thrombin activation of protease-activated receptor 1.  
428 *The Journal of infectious diseases* **207**, 638-50.
- 429 **Joyce, J. A. and Pollard, J. W.** (2009). Microenvironmental regulation of metastasis. *Nat Rev*  
430 *Cancer* **9**, 239-52.
- 431 **Lee, J. C., Hapel, A. J. and Ihle, J. N.** (1982). Constitutive production of a unique lymphokine  
432 (IL 3) by the WEHI-3 cell line. *Journal of immunology (Baltimore, Md : 1950)* **128**, 2393-8.
- 433 **Lou, E., Fujisawa, S., Morozov, A., Barlas, A., Romin, Y., Dogan, Y., Gholami, S., Moreira,**  
434 **A. L., Manova-Todorova, K. and Moore, M. A.** (2012). Tunneling nanotubes provide a unique conduit  
435 for intercellular transfer of cellular contents in human malignant pleural mesothelioma. *PLoS One* **7**,  
436 e33093.

- 437 **Matula, Z., Nemeth, A., Lorincz, P., Szepesi, A., Anna, B., Buzas, E. I., Low, P., Nemet, K.,**  
438 **Uher, F. and Urban, V.** (2016). The role of extracellular vesicle and tunneling nanotube-mediated  
439 intercellular cross-talk between mesenchymal stem cells and human peripheral T cells. *Stem Cells Dev.*
- 440 **McCormack, E., Haaland, I., Venas, G., Forthun, R. B., Huseby, S., Gausdal, G.,**  
441 **Knappskog, S., Micklem, D. R., Lorens, J. B., Bruserud, O. et al.** (2012). Synergistic induction of p53  
442 mediated apoptosis by valproic acid and nutlin-3 in acute myeloid leukemia. *Leukemia* **26**, 910-7.
- 443 **Obr, A., Roselova, P., Grebenova, D. and Kuzelova, K.** (2014). Real-time analysis of imatinib-  
444 and dasatinib-induced effects on chronic myelogenous leukemia cell interaction with fibronectin. *PLoS*  
445 *One* **9**, e107367.
- 446 **Omsland, M., Bruserud, O., Gjertsen, B. T. and Andresen, V.** (2017). Tunneling nanotube  
447 (TNT) formation is downregulated by cytarabine and NF-kappaB inhibition in acute myeloid leukemia  
448 (AML). *Oncotarget* **8**, 7946-7963.
- 449 **Onfelt, B., Nedvetzki, S., Yanagi, K. and Davis, D. M.** (2004). Cutting edge: Membrane  
450 nanotubes connect immune cells. *Journal of immunology (Baltimore, Md : 1950)* **173**, 1511-3.
- 451 **Osteikoetxea-Molnar, A., Szabo-Meleg, E., Toth, E. A., Oszvald, A., Izsepi, E., Kremlitzka,**  
452 **M., Biri, B., Nyitray, L., Bozo, T., Nemeth, P. et al.** (2016). The growth determinants and transport  
453 properties of tunneling nanotube networks between B lymphocytes. *Cell Mol Life Sci* **73**, 4531-4545.
- 454 **Pasquier, J., Guerrouahen, B. S., Al Thawadi, H., Ghiabi, P., Maleki, M., Abu-Kaoud, N.,**  
455 **Jacob, A., Mirshahi, M., Galas, L., Raffi, S. et al.** (2013). Preferential transfer of mitochondria from  
456 endothelial to cancer cells through tunneling nanotubes modulates chemoresistance. *J Transl Med* **11**, 94.
- 457 **Polak, R., de Rooij, B., Pieters, R. and den Boer, M. L.** (2015). B-cell precursor acute  
458 lymphoblastic leukemia cells use tunneling nanotubes to orchestrate their microenvironment. *Blood* **126**,  
459 2404-14.
- 460 **Rainy, N., Chetrit, D., Rouger, V., Vernitsky, H., Rechavi, O., Marguet, D., Goldstein, I.,**  
461 **Ehrlich, M. and Kloog, Y.** (2013). H-Ras transfers from B to T cells via tunneling nanotubes. *Cell death*  
462 *& disease* **4**, e726.
- 463 **Reichert, D., Scheinpflug, J., Karbanova, J., Freund, D., Bornhauser, M. and Corbeil, D.**  
464 (2016). Tunneling nanotubes mediate the transfer of stem cell marker CD133 between hematopoietic  
465 progenitor cells. *Exp Hematol.*
- 466 **Rustom, A., Saffrich, R., Markovic, I., Walther, P. and Gerdes, H.-H.** (2004). Nanotubular  
467 highways for intercellular organelle transport. *Science (New York, N Y)* **303**, 1007-10.
- 468 **Salgia, R., Li, J. L., Ewaniuk, D. S., Pear, W., Pisick, E., Burky, S. A., Ernst, T., Sattler, M.,**  
469 **Chen, L. B. and Griffin, J. D.** (1997). BCR/ABL induces multiple abnormalities of cytoskeletal function.  
470 *J Clin Invest* **100**, 46-57.
- 471 **Seyed-Razavi, Y., Hickey, M. J., Kuffova, L., McMnamin, P. G. and Chinnery, H. R.**  
472 (2013). Membrane nanotubes in myeloid cells in the adult mouse cornea represent a novel mode of  
473 immune cell interaction. *Immunol Cell Biol* **91**, 89-95.
- 474 **Shieh, S. Y., Taya, Y. and Prives, C.** (1999). DNA damage-inducible phosphorylation of p53 at  
475 N-terminal sites including a novel site, Ser20, requires tetramerization. *EMBO J* **18**, 1815-23.

476 **Silden, E., Hjelle, S. M., Wergeland, L., Sulen, A., Andresen, V., Bourdon, J. C., Micklem, D.**  
477 **R., McCormack, E. and Gjertsen, B. T.** (2013). Expression of TP53 isoforms p53beta or p53gamma  
478 enhances chemosensitivity in TP53(null) cell lines. *PLoS One* **8**, e56276.

479 **Simonsson, B., Gedde-Dahl, T., Markevarn, B., Remes, K., Stentoft, J., Almqvist, A.,**  
480 **Bjoreman, M., Flogegard, M., Koskenvesa, P., Lindblom, A. et al.** (2011). Combination of pegylated  
481 IFN-alpha2b with imatinib increases molecular response rates in patients with low- or intermediate-risk  
482 chronic myeloid leukemia. *Blood* **118**, 3228-35.

483 **Sowinski, S., Jolly, C., Berninghausen, O., Purbhoo, M. A., Chauveau, A., Kohler, K.,**  
484 **Oddos, S., Eissmann, P., Brodsky, F. M., Hopkins, C. et al.** (2008). Membrane nanotubes physically  
485 connect T cells over long distances presenting a novel route for HIV-1 transmission. *Nature cell biology*  
486 **10**, 211-9.

487 **Van Etten, R. A., Jackson, P. K., Baltimore, D., Sanders, M. C., Matsudaira, P. T. and**  
488 **Janmey, P. A.** (1994). The COOH terminus of the c-Abl tyrosine kinase contains distinct F- and G-actin  
489 binding domains with bundling activity. *J Cell Biol* **124**, 325-40.

490 **Verfaillie, C. M., McCarthy, J. B. and McGlave, P. B.** (1992). Mechanisms underlying  
491 abnormal trafficking of malignant progenitors in chronic myelogenous leukemia. Decreased adhesion to  
492 stroma and fibronectin but increased adhesion to the basement membrane components laminin and  
493 collagen type IV. *The Journal of clinical investigation* **90**, 1232-41.

494 **Wang, X. and Gerdes, H. H.** (2015). Transfer of mitochondria via tunneling nanotubes rescues  
495 apoptotic PC12 cells. *Cell death and differentiation* **22**, 1181-91.

496 **Wertheim, J. A., Perera, S. A., Hammer, D. A., Ren, R., Boettiger, D. and Pear, W. S.** (2003).  
497 Localization of BCR-ABL to F-actin regulates cell adhesion but does not attenuate CML development.  
498 *Blood* **102**, 2220-8.

499 **Zaccard, C. R., Rinaldo, C. R. and Mailliard, R. B.** (2016). Linked in: immunologic membrane  
500 nanotube networks. *J Leukoc Biol* **100**, 81-94.

501 **Zunder, E. R., Finck, R., Behbehani, G. K., Amir el, A. D., Krishnaswamy, S., Gonzalez, V.**  
502 **D., Lorang, C. G., Bjornson, Z., Spitzer, M. H., Bodenmiller, B. et al.** (2015). Palladium-based mass  
503 tag cell barcoding with a doublet-filtering scheme and single-cell deconvolution algorithm. *Nat Protoc* **10**,  
504 316-33.

505

506

507

508

509

510

## Figure legends

### 511 **Fig 1: CML therapy influence TNT formation in CML cells**

512 (A) TNT quantification of bone marrow samples from 4 different CML patients, results are  
513 presented as number of TNTs/100 cells from the average of duplicates. (B) Number of TNTs  
514 were quantified in Kcl-22 (memGFP) cells treated with 100 U/ml of IFN $\alpha$  for 24 h compared to  
515 untreated (Ctr) (C) Time-lapse of Kcl-22 cells (memGFP) treated for 1 h with IFN $\alpha$  where  
516 images were captured every 10<sup>th</sup> second for a total of 120 seconds. Arrow heads show movement  
517 of memGFP along the TNT structure over time. (D) Kcl-22 (memGFP) cells were untreated (Ctr)  
518 or treated with 100 nM nilotinib (Nilo) for 24 h. (E) Mass cytometry analysis of down-stream  
519 signaling pathways of BCR-ABL1 in Kcl-22 cells treated with nilotinib (100 nM) for 24h.  
520 Results are illustrated by fold changes relative to control (all gated for live cells) based on  
521 calculated Arcsinh Ratio of Medians, median from three independent experiments are shown. (F)  
522 Kcl-22 cells were untreated (Ctr) or treated with 100 nM nilotinib (Nilo) for 1 h. Scale bar = 10  
523  $\mu$ m. For all displayed graphs: Mean  $\pm$  standard deviation (s.d.) used together with unpaired t-tests  
524 ( $P^{**}<0.005$ , n.s= not significant). All TNT quantifications were performed at least three  
525 independent times unless otherwise noted. Fluorescence microscopy was performed by the use of  
526 AxioObserver Z1 fluorescence microscope (Carl Zeiss, Inc, Thornwood, NY) with Alpha Plan  
527 Apochromat 63X/1.4 NA Oil DICIII.

### 528 **Fig 2: Nilotinib induces TNTs in an actin dependent manner**

529 (A) Kcl-22 cells treated with 100 nM nilotinib 1 h, fixed with 4% PFA and stained with  
530 phalloidin AF350 followed by anti- $\beta$ -tubulin staining. Representative images of three  
531 independent experiments are shown. Scale bars = 10  $\mu$ m. (B) Kcl-22 cells were untreated (Ctr) or

532 treated with 100 nM nilotinib (Nilo) for 24 h and TNT quantification was performed before and  
533 after addition of CytochalasinD (CytD, 2  $\mu$ M) for 20 min, at 37°C. (C) Representative  
534 fluorescence images from three independent experiments performed in duplicate of Kcl-22  
535 (memGFP) cells with no treatment (Ctr) or treatment with nilotinib (Nilo), cytochalasin D (CytD)  
536 or nilotinib (Nilo) followed by cytochalasin D (CytD). Scale bar = 10  $\mu$ m. For all displayed  
537 graphs: Mean  $\pm$ standard deviation (s.d.) used together with unpaired t-tests ( $P^{**}<0.005$ ,  
538  $P^{***}<0.001$ , n.s= not significant). All TNT quantifications were performed at least three  
539 independent times. Fluorescence microscopy was performed by the use of AxioObserver Z1  
540 fluorescence microscope (Carl Zeiss, Inc, Thornwood, NY) with Alpha Plan Apochromat  
541 63X/1.4 NA Oil DICIII.

542 **Fig 3: BCR-ABL1 effects of TNT formation and cell morphology**

543 (A) Immunoblotting of Ba/F3 BCR-ABL1 doxycycline (Dox) inducible cells. Ba/F3 cells  
544 transduced with empty vector (E.V.) and Ba/F3 transduced with BCR-ABL1 were untreated or  
545 treated with 0.1  $\mu$ M doxycycline for 24 h. Anti-cAbl antibody was used to verify BCR-ABL1  
546 expression. K562 cells were used as positive control and COXIV as loading control. (B)  
547 Fluorescence microscopy of Ba/F3 BCR-ABL1 doxycycline inducible cells cultured in the  
548 presence or absence of IL-3 and with (+Dox) or without (Ctr) 0.1 g/ml doxycycline, cells were  
549 stained with WGA488. Scale bars: = 10  $\mu$ m. (C) TNT quantification of Ba/F3 transduced with  
550 empty vector (black bars) and BCR-ABL1 doxycycline inducible Ba/F3 cells (grey bars) cultured  
551 in the presence (+) or absence (-) of IL-3 from 10% WEHI conditioned medium and with (+) or  
552 without 0.1 g/ml doxycycline (-), 1  $\mu$ g/ml puromycin was present in the culture media in all  
553 conditions. (D) Fluorescence microscopy of Kcl-22 (memGFP) cells untreated (Ctr) or treated for  
554 1 h with nilotinib (Nilo) or IFN $\alpha$  (100 U/ml). Scale bar= 10  $\mu$ m. (E) Microscopy was performed



555 using AxioObserver Z1 fluorescence microscope (Carl Zeiss, Inc, Thornwood, NY) with Alpha  
556 Plan Apochromat 63X/1.4 NA Oil DICIII. All data are presented as mean  $\pm$ standard deviation  
557 (s.d.) and investigated for significance by unpaired t-tests: ( $P^{**}<0.005$ ). All experiments were  
558 performed three times except TNT quantification of Ba/F3 treated with doxocycline and  
559 incubated without IL-3 (n=2).

560 **Fig 4: CML cell adherence to fibronectin enhances TNT formation and reduce cell mobility**

561 (A) Kcl-22 (memGFP) cells were pre-treated for 30 min with anti- $\beta$ 1 integrin blocking antibody  
562 (10  $\mu$ g/ml) before seeded in fibronectin-coated IBIDI wells and allowed to adhere for 3 h before  
563 treated for 1 h with nilotinib (Nilo) (1  $\mu$ M) or IFN $\alpha$  (100 U/ml). Cells were investigated by  
564 fluorescence microscopy. Scale bars = 10  $\mu$ m. (B) Cell area of experiments in (A) was measured  
565 manually using ImageJ. (C) Cells seeded on fibronectin were tracked for motility by live cell  
566 imaging and analyzed using using metamorph and measurements were calculated using  
567 Chemotaxis and Migration (IBIDI) plugin in ImageJ. (D) Statistical analysis of motility of the  
568 Kcl-22 cells following the different treatment conditions. Significant changes were calculated  
569 using unpaired Mann-Whitney test. Mean  $\pm$ standard deviation (s.d.) ( $P^{*}<0.05$ ,  $P^{***}<0.001$ , n.s=  
570 not significant). Results are presented as mean  $\pm$ standard deviation (s.d.) and significance  
571 investigated by the use of unpaired t-tests ( $P^{***}<0.001$ , n.s= not significant).

572



**Figure 1**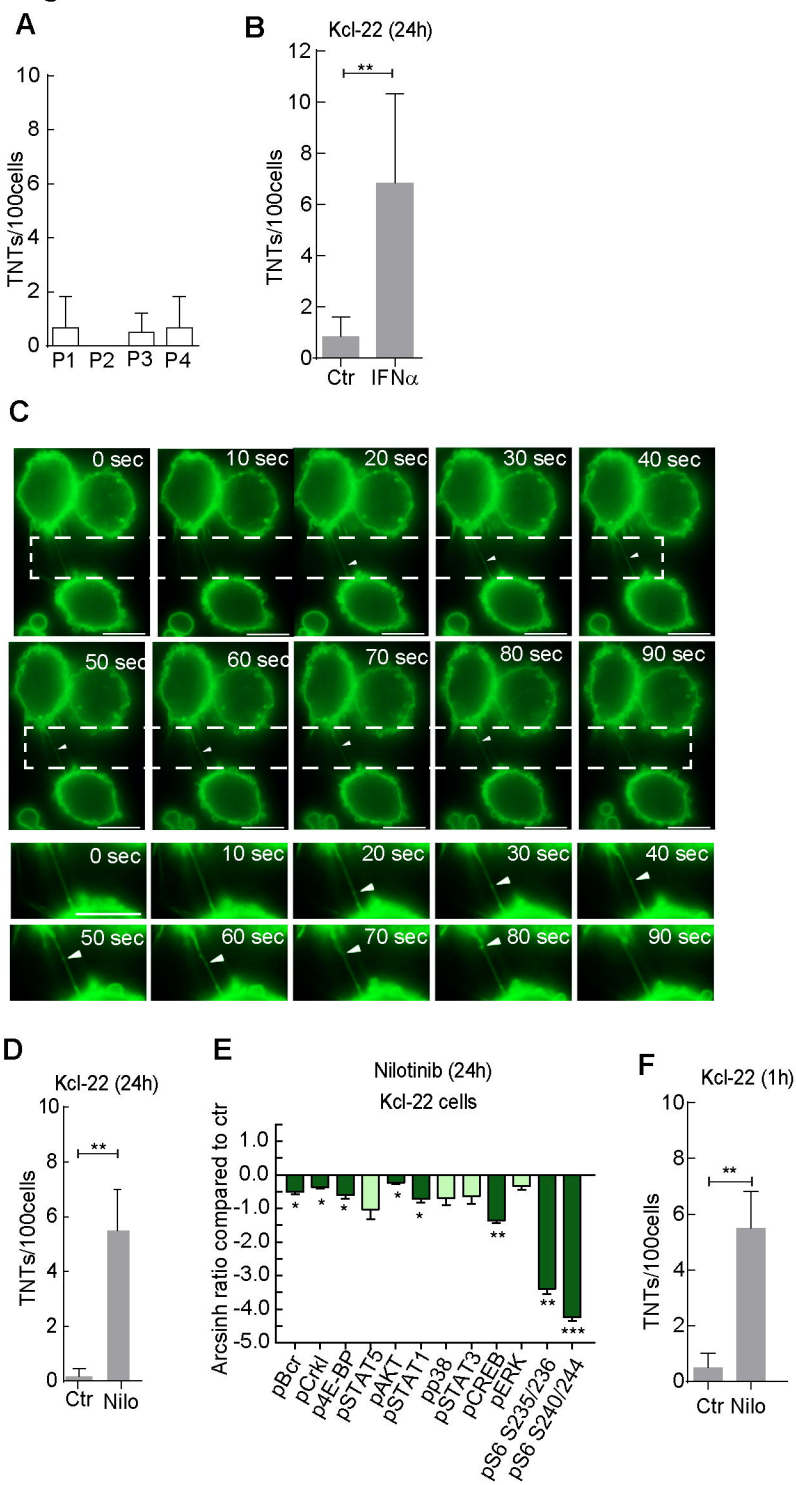

**Figure 2**

**A**

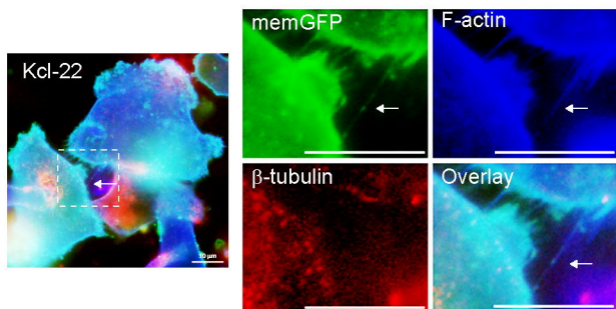

**B**

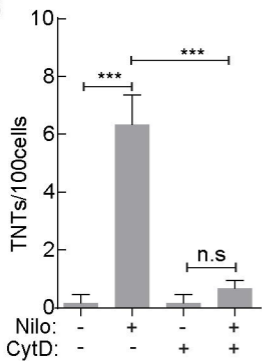

**C**

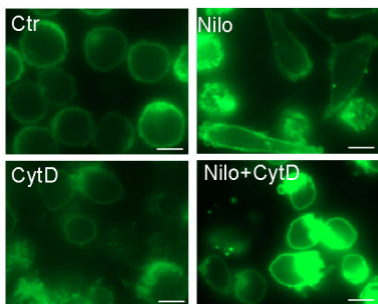

# Figure 3

**A**

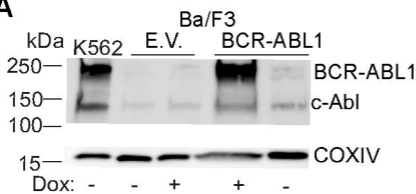

**B**

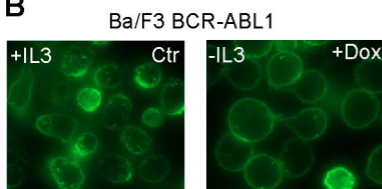

**C**

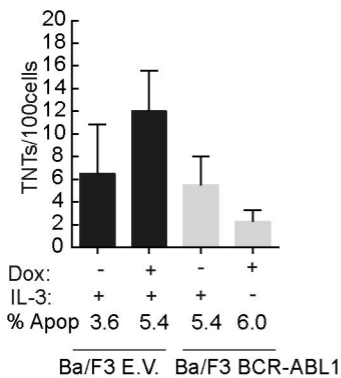

**D**

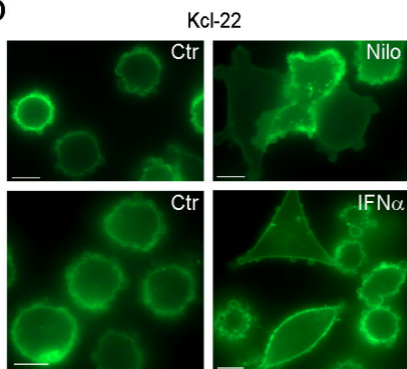

**Figure 4****A**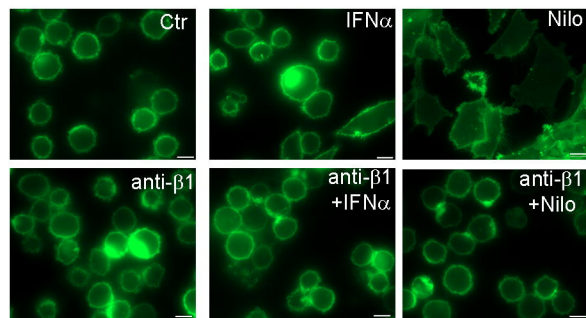**B**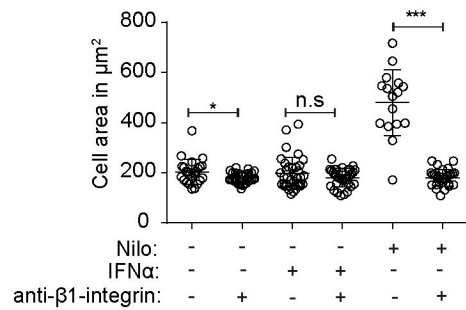**C**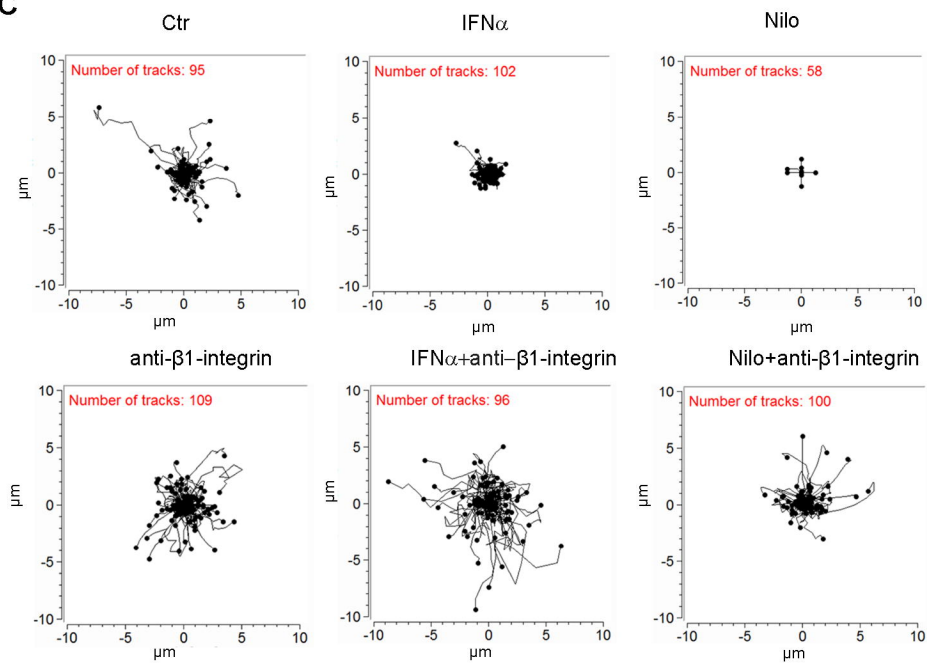**D**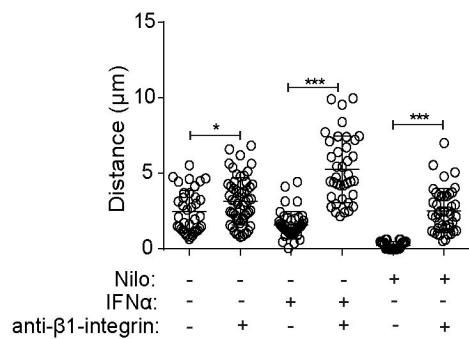

Source: http://biorxiv.org/content/10.1101/297838v2.full.pdf
